# Supplementary material for: Long-term IL-33–producing epithelial progenitor cells in chronic obstructive lung disease
Source: JCI journal article supplement (doi:10.1172/jci65570), 2013-08-14
Supplement: sd1 [file 1]

## Supplemental Material

### Long-term IL-33 producing epithelial progenitor cells in chronic obstructive lung disease

Derek E. Byers<sup>1\*</sup>, Jennifer Alexander-Brett<sup>1\*</sup>, Anand C. Patel<sup>1,2</sup>, Eugene Agapov<sup>1</sup>, Geoffrey Dang-Vu<sup>1</sup>, Xiaohua Jin<sup>1</sup>, Kangyun Wu<sup>1</sup>, Yingian You<sup>1</sup>, Yael Alevy<sup>1</sup>, Jean-Philippe Girard<sup>3</sup>, Thaddeus S. Stappenbeck<sup>4</sup>, G. Alexander Patterson<sup>5</sup>, Richard A. Pierce<sup>1</sup>, Steven L. Brody<sup>1</sup>, and Michael J. Holtzman<sup>1,6</sup>

<sup>1</sup>Department of Medicine, <sup>2</sup>Department of Pediatrics, <sup>4</sup>Department of Pathology and Immunology, <sup>5</sup>Department of Surgery, and <sup>6</sup>Department of Cell Biology, Washington University School of Medicine, Saint Louis, MO 63110 and <sup>3</sup>Institute of Pharmacology and Structural Biology, National Center of Scientific Research, University of Toulouse, Toulouse France F-31077

\*Contributed equally to the work

Address correspondence to: M.J.H., Washington University School of Medicine, Campus Box 8012, 660 South Euclid Avenue, Saint Louis, MO 63110; Tel 314-362-8970; Fax 314-362-9009; E-mail [holtzmanm@wustl.edu](mailto:holtzmanm@wustl.edu)

**Supplemental Table 1.** Gene expression in lungs from mice at SeV versus SeV-UV post-inoculation (p.i.) Day 49. This list includes the 20 genes with the greatest fold-change as well as interleukin genes and basal cell markers (*Krt5*, *Ngfr*, and *Itga6*). Values correspond to those in Figure 1A.

| Gene Symbol         | Gene Description                                           | Gene Expression (Log2, mouse lung, d49 PI) |        | Fold Change (SeV vs SeV-UV) | Rank (by fold-change) |
|---------------------|------------------------------------------------------------|--------------------------------------------|--------|-----------------------------|-----------------------|
|                     |                                                            | SeV                                        | SeV-UV |                             |                       |
| <i>Clca3</i>        | chloride channel calcium activated 3                       | 13.79                                      | 6.90   | 128.88                      | 1                     |
| <i>Krt14</i>        | keratin 14                                                 | 12.96                                      | 6.85   | 69.15                       | 2                     |
| <i>Ear11</i>        | eosinophil-associated, ribonuclease A family, member 11    | 11.68                                      | 6.45   | 37.50                       | 3                     |
| <i>Retnla</i>       | resistin like alpha                                        | 14.67                                      | 9.65   | 32.35                       | 4                     |
| <i>Krt17</i>        | keratin 17                                                 | 11.46                                      | 6.56   | 29.97                       | 5                     |
| <i>Slc26a4</i>      | solute carrier family 26, member 4                         | 12.32                                      | 7.54   | 27.34                       | 6                     |
| <i>Arg1</i>         | arginase, liver                                            | 11.33                                      | 7.02   | 23.48                       | 7                     |
| <i>Chi3l4</i>       | chitinase 3-like 4                                         | 15.02                                      | 11.42  | 17.90                       | 8                     |
| <i>Saa3</i>         | Serum amyloid A 3                                          | 11.35                                      | 7.21   | 17.59                       | 9                     |
| <i>Spp1</i>         | Secreted phosphoprotein 1                                  | 12.28                                      | 8.38   | 14.98                       | 10                    |
| <i>Nmes1/Mir147</i> | normal mucosa esophagus specific 1                         | 12.25                                      | 8.48   | 13.59                       | 11                    |
| <i>Plunc</i>        | palate, lung, and nasal epithelium associated              | 13.49                                      | 9.74   | 13.48                       | 12                    |
| <i>Alox12e</i>      | arachidonate lipoxygenase, epidermal                       | 10.21                                      | 6.53   | 12.84                       | 13                    |
| <i>Gp2</i>          | glycoprotein 2 (zymogen granule membrane)                  | 10.51                                      | 6.96   | 11.69                       | 14                    |
| <i>Scgb3a1</i>      | secretoglobin, family 3A, member 1                         | 11.88                                      | 8.59   | 10.86                       | 15                    |
| <i>Ltf</i>          | lactotransferrin                                           | 9.94                                       | 6.74   | 10.71                       | 16                    |
| <i>Dmbt1</i>        | deleted in malignant brain tumors 1                        | 9.94                                       | 6.55   | 10.45                       | 17                    |
| <i>Aqp3</i>         | aquaporin 3                                                | 10.26                                      | 6.96   | 9.84                        | 18                    |
| <i>Krt15</i>        | keratin 15                                                 | 10.14                                      | 6.87   | 9.65                        | 19                    |
| <i>Ctsk</i>         | cathepsin K                                                | 13.00                                      | 9.76   | 9.45                        | 20                    |
| <i>Trp63</i>        | transformation related protein 63                          | 9.79                                       | 6.78   | 8.07                        | 24                    |
| <i>Il33</i>         | interleukin 33                                             | 12.03                                      | 9.65   | 5.22                        | 49                    |
| <i>Krt5</i>         | keratin 5                                                  | 8.95                                       | 6.68   | 4.82                        | 58                    |
| <i>Il1rn</i>        | interleukin 1 receptor antagonist                          | 9.28                                       | 7.77   | 2.89                        | 155                   |
| <i>Ngfr</i>         | nerve growth factor receptor (TNFR superfamily, member 16) | 8.17                                       | 6.94   | 2.34                        | 258                   |
| <i>Il8ra</i>        | chemokine (C-X-C motif) receptor 1                         | 9.59                                       | 8.39   | 2.30                        | 273                   |
| <i>Il20rb</i>       | interleukin 20 receptor beta                               | 8.17                                       | 7.51   | 1.57                        | 946                   |
| <i>Il4</i>          | interleukin 4                                              | 7.75                                       | 7.27   | 1.39                        | 1522                  |
| <i>Il31ra</i>       | interleukin 31 receptor A                                  | 7.23                                       | 6.81   | 1.34                        | 1838                  |
| <i>Il17rb</i>       | interleukin 17 receptor B                                  | 7.06                                       | 6.71   | 1.28                        | 2333                  |

**Supplemental Table 1.** (continued)

| Gene Symbol | Gene Description                         | Gene Expression<br>(Log <sub>2</sub> , mouse<br>lung, d49 PI) |        | Fold<br>Change<br>(SeV vs<br>UV-SeV) | Rank (by<br>absolute<br>fold-<br>change) |
|-------------|------------------------------------------|---------------------------------------------------------------|--------|--------------------------------------|------------------------------------------|
|             |                                          | SeV                                                           | UV-SeV |                                      |                                          |
| Il1rl1      | interleukin 1 receptor-like 1            | 7.05                                                          | 6.76   | 1.22                                 | 3050                                     |
| Il13ra1     | interleukin 13 receptor, alpha 1         | 10.25                                                         | 9.98   | 1.21                                 | 3298                                     |
| Il7r        | interleukin 7 receptor                   | 6.78                                                          | 6.78   | 1.17                                 | 3869                                     |
| Il25        | interleukin 25                           | 6.60                                                          | 6.55   | 1.04                                 | 12264                                    |
| Il1rap      | interleukin 1 receptor accessory protein | 7.21                                                          | 7.15   | -1.01                                | 17853                                    |
| Tslp        | thymic stromal lymphopoietin             | 6.43                                                          | 6.50   | -1.05                                | 23868                                    |
| Itga6       | integrin alpha 6                         | 7.07                                                          | 7.31   | -1.10                                | 28041                                    |
| Il17ra      | interleukin 17 receptor A                | 7.47                                                          | 7.87   | -1.32                                | 33588                                    |
| Il10ra      | interleukin 10 receptor, alpha           | 8.75                                                          | 9.16   | -1.33                                | 33736                                    |
| Il6ra       | interleukin 6 receptor, alpha            | 7.56                                                          | 8.00   | -1.48                                | 34717                                    |
| Il12a       | interleukin 12a                          | 7.60                                                          | 8.17   | -1.49                                | 34763                                    |
| Il8rb       | chemokine (C-X-C motif) receptor 2       | 7.17                                                          | 8.13   | -1.94                                | 35785                                    |

**Supplemental Table 2.** Clinical characteristics of lung transplant donors without COPD (Non-COPD) and recipients with severe (GOLD Stage IV) COPD.

| <b>Characteristics</b>         | <b>Non-COPD</b> | <b>COPD</b> |
|--------------------------------|-----------------|-------------|
| Number per group               | 18              | 35          |
| Mean age (range)               | 43 (11-56)      | 59 (44-69)  |
| Male:Female                    | 9:9             | 19:16       |
| FVC (L)                        | –               | 2.03 ± 0.64 |
| FVC (% predicted)              | –               | 54.9%       |
| FEV1 (L)                       | –               | 0.55 ± 0.16 |
| FEV <sub>1</sub> (% predicted) | –               | 18.5%       |
| Pack-years (range)             | 3.8 (0-20)      | 47 (25-60+) |

**Supplemental Table 3.** Sources and sequences for primers and probes for real-time PCR assays.

| <b>Human</b>             |   | <b>ID/Sequence</b>                   |
|--------------------------|---|--------------------------------------|
| <i>IL33</i>              | * | Hs01125943_m1                        |
| <i>IL25</i>              | * | Hs00224471_m1                        |
| <i>TSLP</i>              | * | Hs01572933_m1                        |
| <i>IL33R</i>             | * | Hs0249384_m1                         |
| <i>IL13Ra1</i>           | F | 5'-TCTACATACTGGGCATGGCT-3'           |
|                          | R | 5'-AAAGCTGAGCACGTACG-3'              |
|                          | P | 5'-TCTGTCCCTCGTTGAATTCAGGC-3'        |
| <i>MUC5AC</i>            | F | 5'-AGGCCAGCTACCGGGCCGGCCAGACCAT-3'   |
|                          | R | 5'-GTCCCCGTACACGGCGCAGGTGGCCAGGCA-3' |
|                          | P | 5'-TGCAACACCTGCACCTGTGACAGCAGGAT-3'  |
| <i>KRT5<sup>#</sup></i>  | F | 5'-AGAGCCACCTCCTGCGTCCT-3'           |
|                          | R | 5'-CTGAAGCTACGACTGCCCCCG-3'          |
| <i>KRT14<sup>#</sup></i> | F | 5'-CAGAGATGTGACCTCCAGCC-3'           |
|                          | R | 5'-GGACCTGCTCGTGGGTGGACA-3'          |
| <i>TRP63</i>             | * | Hs00609815_m1                        |
| <i>GAPDH</i>             | * | Hs00266705_g1                        |
| <b>Mouse</b>             |   |                                      |
| <i>Il33</i>              | * | Mm00505403_m1                        |
| <i>Il33r</i>             | * | Mm00516117_m1                        |
| <i>Tslp</i>              | * | Mm00498739_m1                        |
| <i>Arg1</i>              | * | Mm00475988_m1                        |
| <i>Il25</i>              | F | 5'-CACACTGCGTCAGCCTACAGA-3'          |
|                          | R | 5'-TGTGGTAAAGTGGGACGGAGTT-3'         |
|                          | P | 5'-CTCCCACATGGACCCGCTGGG-3'          |
| <i>Il13</i>              | F | 5'-GGAGCTGAGCAACATCACACA-3'          |
|                          | R | 5'-CACACTCCATACCATGCTGCC-3'          |
|                          | P | 5'-CCAGACTCCCCTGTGCA-3'              |
| <i>Chi3l3</i>            | F | 5'-CTTGTCACAGGTCTGGCAATTC -3'        |
|                          | R | 5'-GTAGCACATCAGCTGGTAGGAAGA -3'      |
|                          | P | 5'-TCTGAACGTACAGCTGGG -3'            |
| <i>Muc5ac</i>            | F | 5'-TACCACTCCCTGCTTCTGCAGCGTGTCA-3'   |
|                          | R | 5'-ATAGTAACAGTGGCCATCAAGGTCTGTCT-3'  |
|                          | P | 5'-TATACCCCTTGGGATCCATCATCTACA-3'    |
| <i>Gapdh</i>             | F | 5'-TGCAGTGCCAGCCTCGT-3'              |
|                          | R | 5'-CCAATACGGCCAAATCCG-3'             |
|                          | P | 5'-ACACCGACCTTCACCATTTTGTCTACGG-3'   |
| <i>SeV</i>               | F | 5'-GGCGGTGGTGCAATTGAG-3'             |
|                          | R | 5'-CATGAGCTTCTGTTTCTAGGTCGAT-3'      |
|                          | P | 5'-AGCTCTAGACAATGCC-3'               |

\*Purchased from Applied Biosystems.

<sup>#</sup>KRT5 and KRT14 were detected with SYBR-Green based assays.

**Supplemental Table 4.** Specifications and sources of antibodies used for immunostaining.

| Antibody                     | Type/Clone             | Source               |
|------------------------------|------------------------|----------------------|
| <b>Anti-mouse</b>            |                        |                      |
| Acetylated $\alpha$ -tubulin | mAb, 6-11B-1           | Sigma                |
| $\beta$ -galactosidase       | pAb <sup>1</sup>       | Abcam                |
| F4/80                        | mAb CL:A3-1            | Abcam                |
| IL-13                        | pAb                    | R&D Systems          |
| Krt5                         | pAb                    | Abcam                |
| Mac-3                        | mAb, M3/84             | BD Pharmingen        |
| Scgb1a1                      | pAb                    | Santa Cruz           |
| Scgb3a1                      | pAb                    | R&D Systems          |
| Sftpc                        | pAb                    | Abcam                |
| <b>Anti-human</b>            |                        |                      |
| FOXJ1                        | mAb, 3D4               | Washington U.        |
| IL-33                        | mAb, Nussy-1           | Enzo Life Sciences   |
| IL-33                        | pAb                    | Sigma                |
| ITGA6                        | mAb, GoH3              | eBioscience          |
| KRT5                         | pAb                    | Abcam                |
| KRT8                         | mAb, TROMA-I           | DSHB, U. Iowa        |
| KRT14                        | pAb                    | Covance              |
| MUC5AC                       | mAb, 45M1 <sup>2</sup> | Thermo Scientific    |
| NGFR                         | pAb                    | Abcam                |
| SCGB1A1                      | mAb, 394324            | R&D Systems          |
| SCGB3A1                      | pAb                    | R&D Systems          |
| TRP63                        | mAb, 4B1E12            | LifeSpan Biosciences |

<sup>1</sup>pAb, polyclonal antibody.

<sup>2</sup>Cross-reactive with mouse Muc5ac.

## Supplemental Figure 1

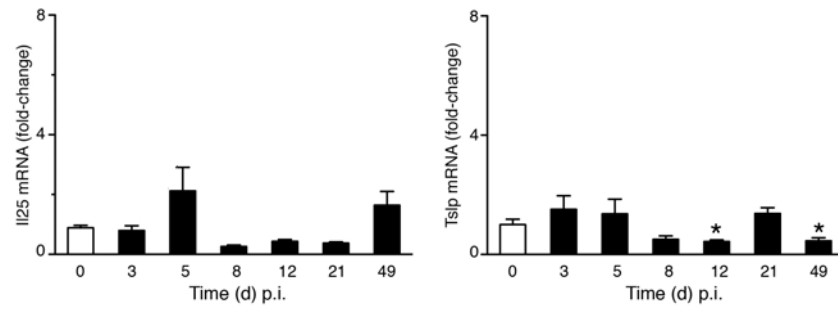

**Supplemental Figure 1.** Time course of IL-25 and TSLP expression levels in the postviral mouse model. Levels of *Il25* and *Tslp* mRNA in lung tissue obtained on the indicated SeV p.i. Day. Bars represent mean  $\pm$  SEM (n=5 mice per condition). We found no significant differences from corresponding values for SeV p.i. Day 0.

## Supplemental Figure 2

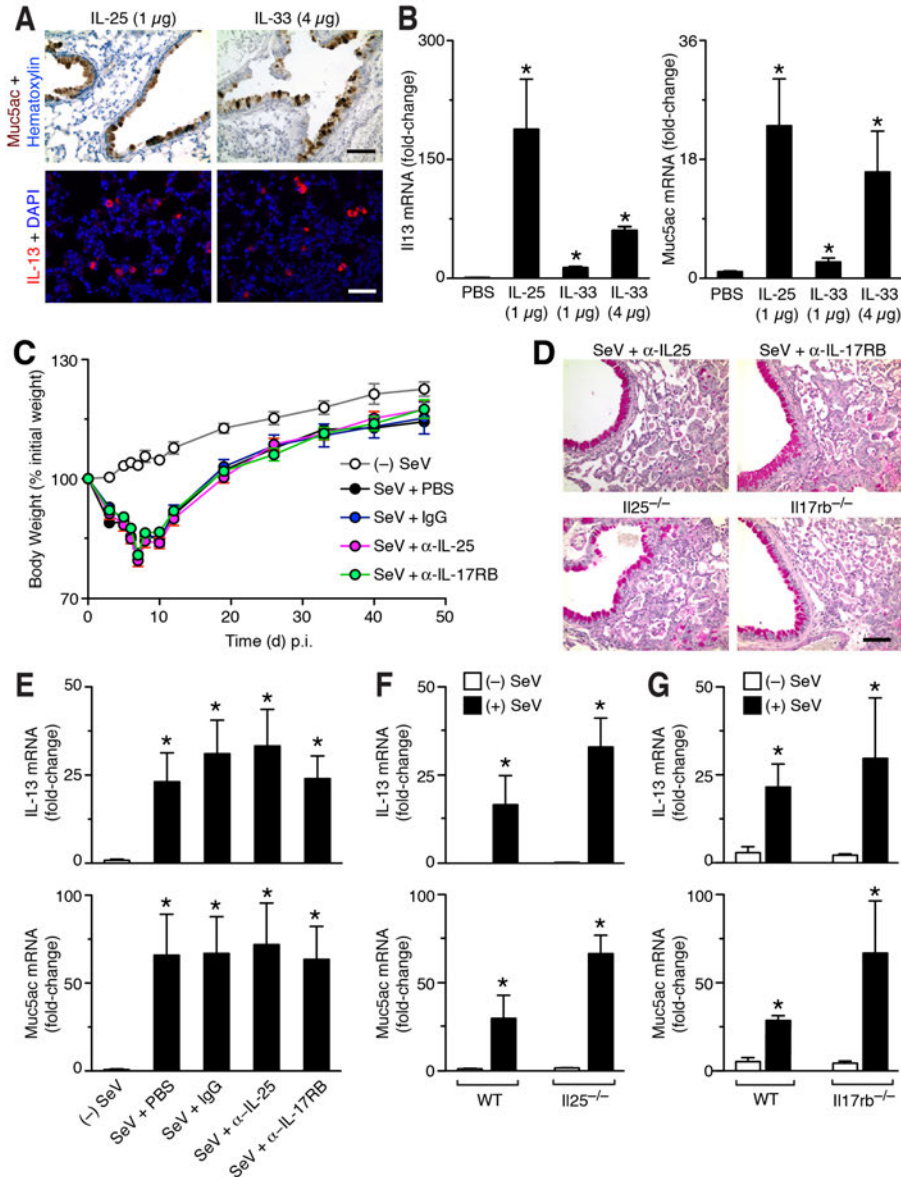

**Supplemental Figure 2.** Effect of IL-25–IL-25R signaling blockade on postviral chronic lung disease. (A) Representative photomicrographs of lung sections from mice given IL-25 or IL-33 (1 or 4  $\mu$ g intranasally on Day 1 and Day 3) and then immunostained for Muc5ac (at Day 7). Bar=50  $\mu$ m. (B) Level of *Il13* and *Muc5ac* mRNA in lungs from mice given IL-25 or IL-33 as in (A). (C) Body weight loss for the indicated groups of mice with or without SeV inoculation. (D) Representative photomicrographs of lung sections from SeV p.i. Day 49 in wild-type mice treated with anti-IL-25 or anti-IL-17RB mAb from p.i. Day 12 to 49 and in *Il25*<sup>-/-</sup> and *Il17rb*<sup>-/-</sup> mice. (E) Levels of *Il13* and *Muc5ac* mRNA in lungs at p.i. Day 49 in WT mice treated with control IgG<sub>1</sub> mAb (IgG), anti-IL25 mAb, or anti-IL17RB mAb from p.i. Day 12 to 49. (F) Lung levels of *Il13* and *Muc5ac* at p.i. Day 49 in *Il25*<sup>-/-</sup> and WT mice. (G) Corresponding values for conditions in (F) for *Il17rb*<sup>-/-</sup> and WT mice. For (B,C,E,F,G), bars represent mean  $\pm$  SEM (n=3-7 mice per condition), and \* represents a significant increase from untreated condition.



### Supplemental Figure 3

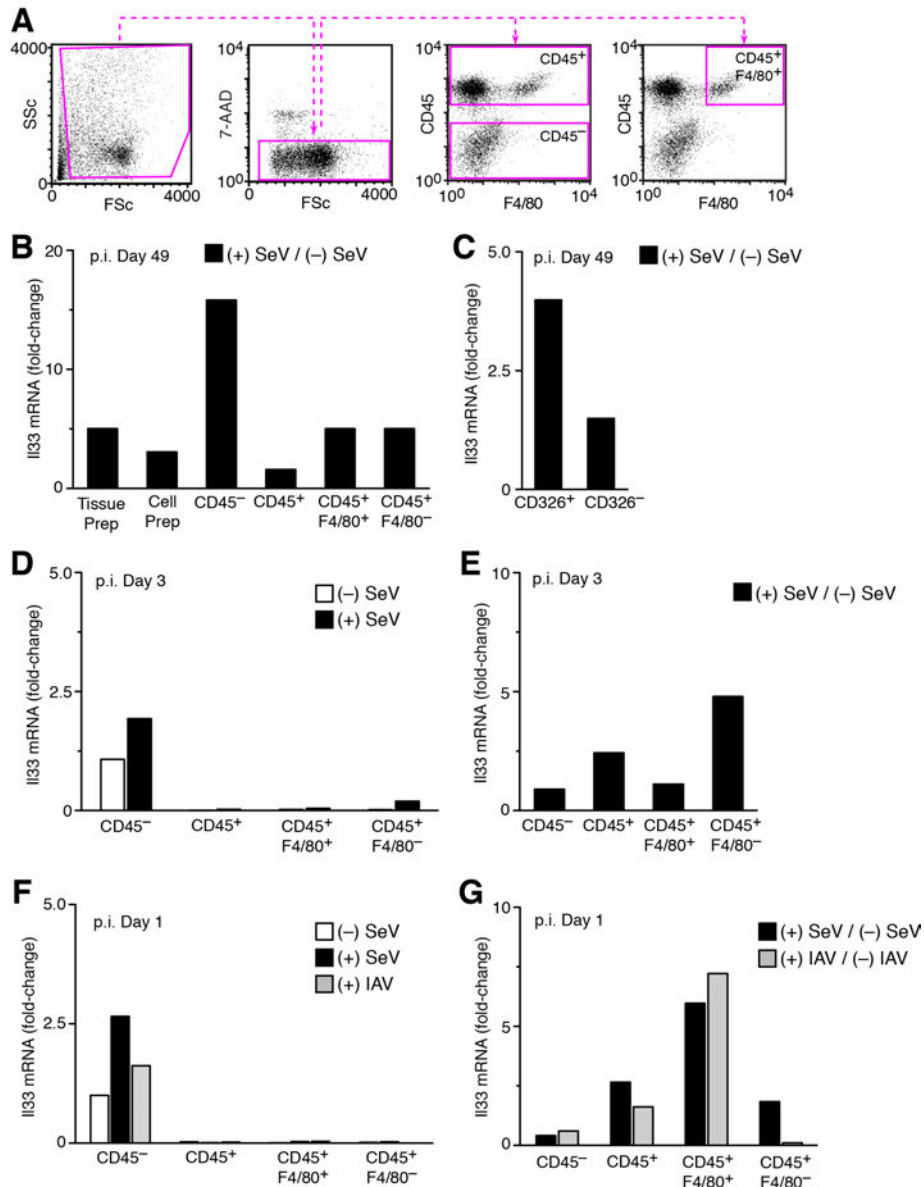

**Supplemental Figure 3.** Expression levels of *I133* during the acute phase of respiratory virus infection. (A) Representative cytograms from FACS analysis of lung immune cells using forward and side scatter and then 7-AAD, CD45, and F4/80 detection. (B) Levels of *I133* mRNA from lung tissue preparation (tissue prep), lung cell preparation before FACS (cell prep), and the indicated cell populations purified by FACS from lungs obtained at SeV p.i. Day 49. Values are calculated as the fold-change within each cell population and are representative of 3 experiments. (C) Levels of *I133* mRNA in CD45<sup>-</sup> lung cells sorted for EpCAM (CD326) at SeV p.i. Day 49. (D) Levels of *I133* mRNA for the indicated populations of lung cells at SeV p.i. Day 3. (E) For (D), corresponding values for *I133* mRNA expressed as fold-change within each cell population. (F) Levels of *I133* mRNA for the indicated populations of lung cells at SeV or IAV p.i. Day 1. (G) For (F), corresponding values for *I133* mRNA expressed as fold-change within each cell population. For (A-F), values are representative of three experiments.

## Supplemental Figure 4

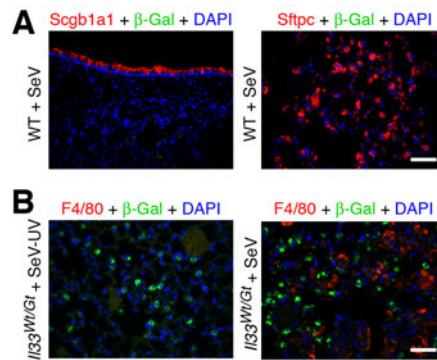

**Supplemental Figure 4.** Cell sources of IL-33 production in the postviral mouse model. **(A)** Representative photomicrographs for epithelial *Scgb1a1* and *Sftpc* immunostaining and DAPI counterstaining at SeV p.i. Day 49 in lung sections from WT mice. Bar=100  $\mu$ m. **(B)** Representative photomicrographs for IL-33 immunostaining (detected with anti- $\beta$ -galactosidase Ab) and F4/80 co-staining and DAPI counterstaining at SeV and SeV-UV p.i. Day 49 in lung sections from *Il33*<sup>Wt/Gt</sup> mice. Bar=100  $\mu$ m.

## Supplemental Figure 5

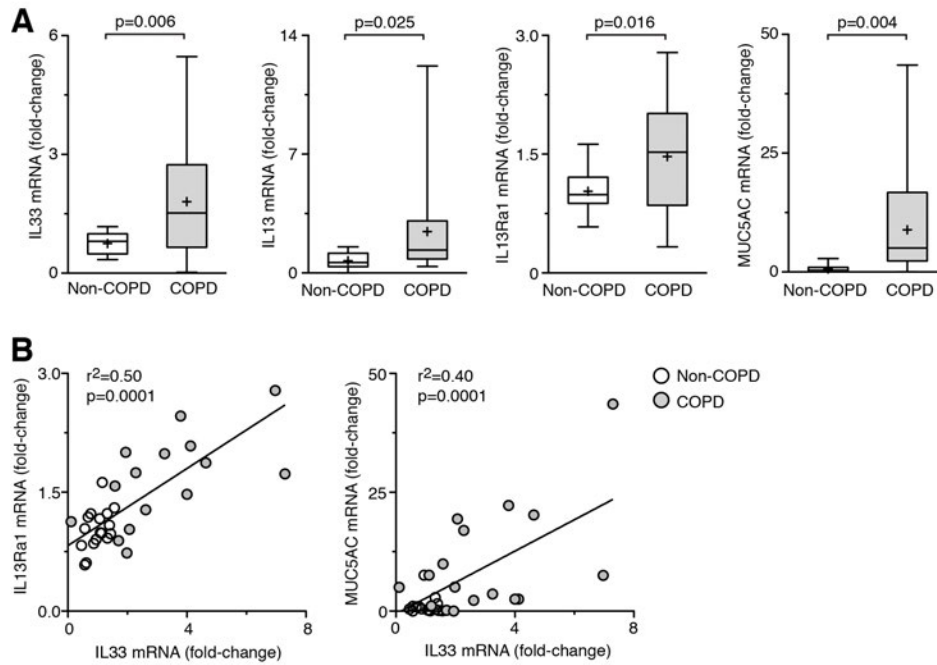

**Supplemental Figure 5.** Analysis of gene expression in lung tissue from non-COPD and very severe COPD subjects. **(A)** Levels of *IL33*, *IL13*, *IL13Ra1*, and *MUC5AC* mRNA in lung tissue samples containing airways from non-COPD ( $n = 17$  airway samples from 7 subjects) and very severe COPD ( $n = 24$  airway samples from 16 subjects). **(B)** For data in **(A)**, correlations of *IL33* with *IL13Ra1* and *MUC5AC* mRNA levels ( $n=41$  airway samples) based on Pearson correlations.

## Supplemental Figure 6

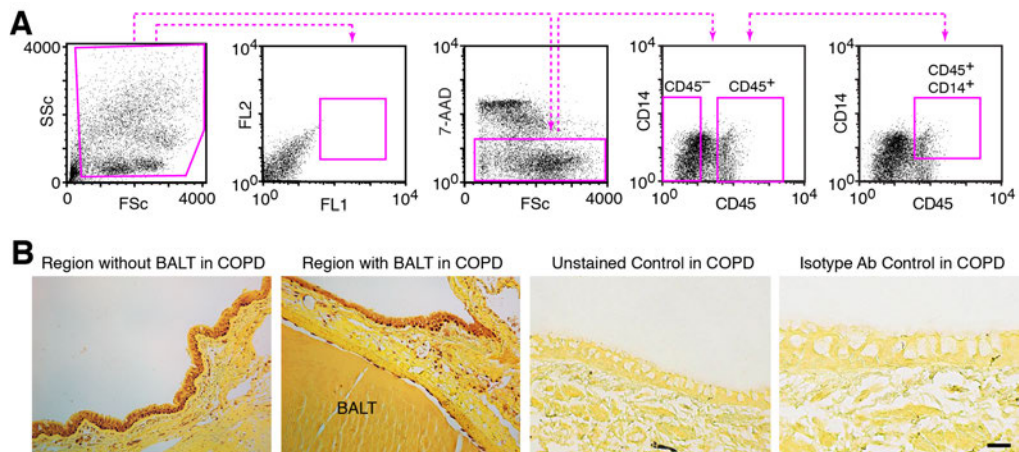

**Supplemental Figure 6.** Analysis of human lung samples using FACS and immunostaining. **(A)** Representative cytograms from FACS analysis of tissue cells from human lung samples using forward scatter (FSc) and side scatter (SSc) and then 7-AAD, CD45, and CD14 detection along with unstained control (FL1/FL2). **(B)** Representative photomicrographs of sections of airway epithelium (with or without associated BALT) that was obtained from a subject with very severe COPD and then immunostained for IL-33 with DAB (brown) reporter and counterstained with tartrazine (yellow) as well as unstained and isotype Ab stained controls. Bar=50  $\mu$ m.

## Supplemental Figure 7

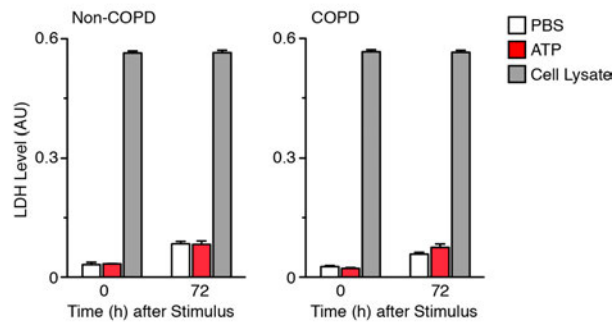

**Supplemental Figure 7.** Lack of effect of ATP on cell viability. Primary-culture hTECs were maintained under 2-D submerged culture conditions and incubated with ATP (10  $\mu$ M) or PBS vehicle control for the indicated times at 37  $^{\circ}$ C as also described in Figure 8H. Levels of LDH release into cell medium for these conditions and for control cell lysate were determined by activity assay. Values represent mean  $\pm$  SEM (n=4 per group and are representative of at least 3 subjects). No significant difference was found for ATP compared to corresponding PBS treatment condition.
